# Supplementary material
Source: PubMed Central journal article supplement (PMC8132300)
Supplement: NIHMS1696944-supplement-Supple_fig_S1.pdf [file NIHMS1696944-supplement-Supple_fig_S1.pdf]

**Figure S1. Study design**

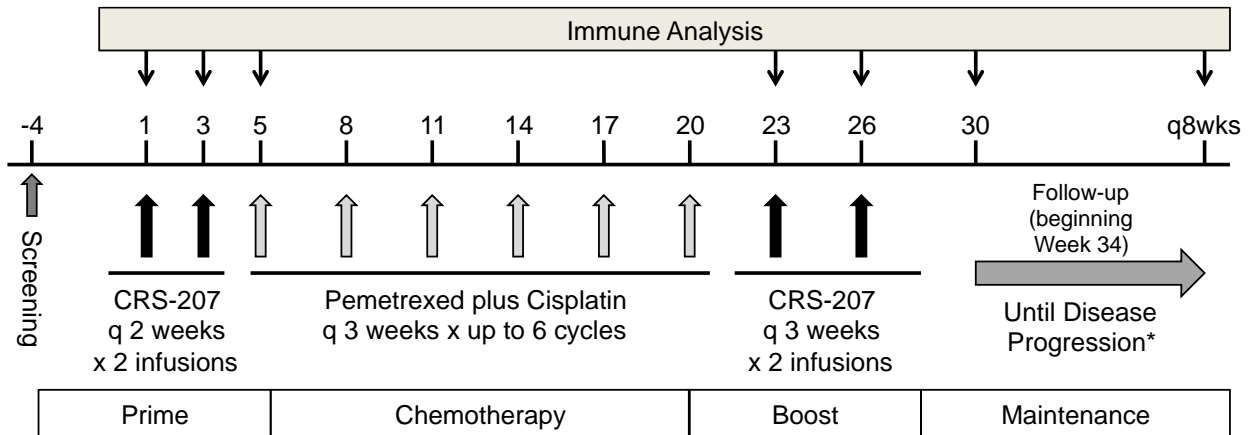

\*Or investigator believes subject is no longer receiving benefit if treatment continued beyond radiographic progression
