# Supplementary material
Source: PubMed Central journal article supplement (PMC8132300)
Supplement: NIHMS1696944-supplement-Supple_fig_S3.pdf [file NIHMS1696944-supplement-Supple_fig_S3.pdf]

**Figure S3 Image cytometry gating strategy for multi-plex IHC analysis of mesothelioma biopsies**

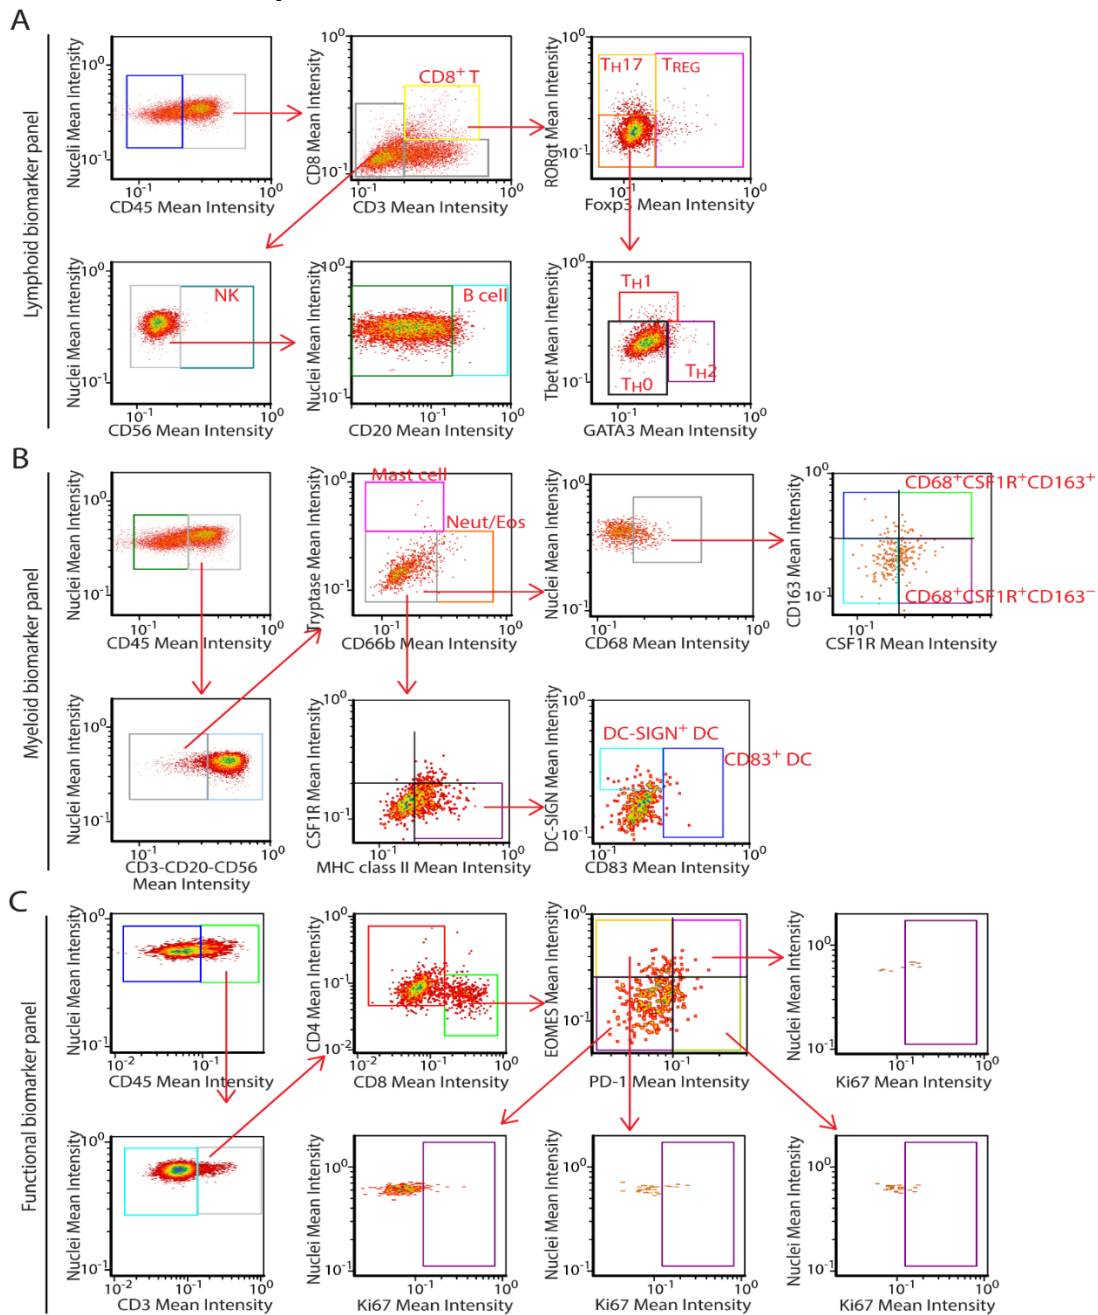

Single cell-based information including the pixel intensity and shape-size measurements was visualized and analyzed with qualitative assessment of signal intensities, analogous to flow cytometry. Gating strategies for identification of lymphoid- (**A**) and myeloid-lineage (**B**) populations, and functional biomarkers (**C**) are shown. Starting from the upper left, arrows indicate directionality of subgates. Markers are indicated to the left and bottom of each polychromatic dot plot. Identified populations are marked in red text.
