# Supplementary material
Source: PubMed Central journal article supplement (PMC8132300)
Supplement: NIHMS1696944-supplement-Supple_fig_S4.pdf [file NIHMS1696944-supplement-Supple_fig_S4.pdf]

**Figure S4. Kinetics of osteopontin and CA-125.**

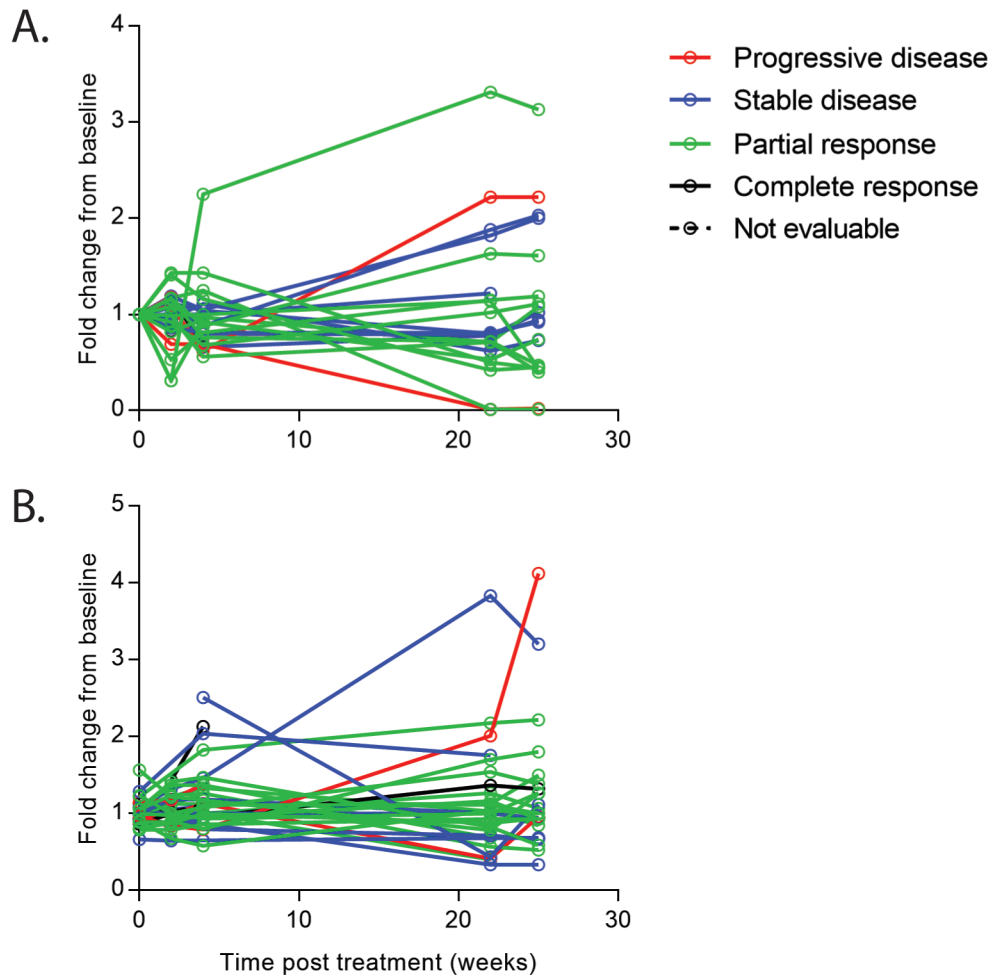

The level of (A) plasma osteopontin and (B) serum CA-125 were determined in 31-38 patients over the course of treatment. Shown is the fold change from baseline for each patient over the course of treatment. Black, complete responder; green, partial responder; blue, stable disease; red, progressive disease; white, not evaluable
