# Supplementary material
Source: PubMed Central journal article supplement (PMC8132300)
Supplement: NIHMS1696944-supplement-Supple_table_S1.pdf [file NIHMS1696944-supplement-Supple_table_S1.pdf]

**Table S1. Biomarkers utilized for defining immune cell lineages in IHC analysis**

| Lineage                      | Abbreviation          | Marker                                                                                                                                                                                                    |
|------------------------------|-----------------------|-----------------------------------------------------------------------------------------------------------------------------------------------------------------------------------------------------------|
| CD8 <sup>+</sup> T cell      | CD8                   | CD45 <sup>+</sup> CD3 <sup>+</sup> CD8 <sup>+</sup>                                                                                                                                                       |
| Regulatory T cell            | T <sub>REG</sub>      | CD45 <sup>+</sup> CD3 <sup>+</sup> CD8 <sup>-</sup> Foxp3 <sup>+</sup>                                                                                                                                    |
| T <sub>H</sub> 17            | T <sub>H</sub> 17     | CD45 <sup>+</sup> CD3 <sup>+</sup> CD8 <sup>-</sup> Foxp3 <sup>-</sup> RORgt <sup>+</sup>                                                                                                                 |
| T <sub>H</sub> 1             | T <sub>H</sub> 1      | CD45 <sup>+</sup> CD3 <sup>+</sup> CD8 <sup>-</sup> Foxp3 <sup>-</sup> RORgt <sup>-</sup> Tbet <sup>+</sup>                                                                                               |
| T <sub>H</sub> 2             | T <sub>H</sub> 2      | CD45 <sup>+</sup> CD3 <sup>+</sup> CD8 <sup>-</sup> Foxp3 <sup>-</sup> RORgt <sup>-</sup> GATA3 <sup>+</sup>                                                                                              |
| T <sub>H</sub> 0 & T other   | T <sub>H</sub> 0      | CD45 <sup>+</sup> CD3 <sup>+</sup> CD8 <sup>-</sup> Foxp3 <sup>-</sup> RORgt <sup>-</sup> Tbet <sup>-</sup> GATA3 <sup>-</sup>                                                                            |
| B cell                       | B cell                | CD45 <sup>+</sup> CD3 <sup>-</sup> CD56 <sup>-</sup> CD20 <sup>+</sup>                                                                                                                                    |
| Natural killer cell          | NK                    | CD45 <sup>+</sup> CD3 <sup>-</sup> CD56 <sup>+</sup>                                                                                                                                                      |
| Macrophage & monocytic cells | Macrophage /Monocytic | CD45 <sup>+</sup> CD3 <sup>-</sup> /CD20 <sup>-</sup> /CD56 <sup>-</sup> CD66b <sup>-</sup> Tryptase <sup>-</sup> CD68 <sup>+</sup>                                                                       |
| Dendritic cell               | DC                    | CD45 <sup>+</sup> CD3 <sup>-</sup> /CD20 <sup>-</sup> /CD56 <sup>-</sup> CD66b <sup>-</sup> Tryptase <sup>-</sup> CSF1R <sup>-</sup><br>MHC class II <sup>+</sup> DC-SIGN <sup>+</sup> /CD83 <sup>+</sup> |
| Neutrophil/Eosinophil        | Neut/Eos              | CD45 <sup>+</sup> CD3 <sup>-</sup> /CD20 <sup>-</sup> /CD56 <sup>-</sup> CD66b <sup>+</sup>                                                                                                               |
| Mast cell                    | Mast cell             | CD45 <sup>+</sup> CD3 <sup>-</sup> /CD20 <sup>-</sup> /CD56 <sup>-</sup> CD66b <sup>-</sup> Tryptase <sup>+</sup>                                                                                         |
